# Supplementary material
Source: PubMed Central journal article supplement (PMC1599858)

# **ELECTRONIC APPENDIX**

This is the Electronic Appendix to the article

## **A Comparative Analysis of the Evolutionary Relationship Between Diet and Enzyme Targeting in Bats, Marsupials and Other Mammals**

by

Graeme M. Birdsey, Jackie Lewin, Joanna D. Holbrook, Victor R. Simpson,  
Andrew A. Cunningham & Christopher J. Danpure

*Proc. R. Soc. B* (doi:10.1098/rspb.2004.3011)

Electronic appendices are refereed with the text; however, no attempt is made to impose a uniform editorial style on the electronic appendices.

## ONLINE APPENDIX

### **Appendix table A.**

#### **Comparative analysis of AGT subcellular distribution with various character traits.**

**A)** Maximum likelihood analysis using the CONTINUOUS computer program. Log likelihood values ( $\ln L$ ) were calculated for the hypothesis  $H_1$  (i.e. that there is a relationship between the two character traits) and for the null hypothesis  $H_0$  (i.e. that there is no association between the two traits). The likelihood ratio test statistic is calculated as twice the log likelihood difference, and is compared with a  $\chi^2$  distribution to test whether the alternative hypothesis fits the data significantly better than the null hypothesis. **B)**

Phylogenetically independent contrasts were calculated using the CAIC computer program. Linear regression through the origin was used to statistically analyse the relationship between contrasts. The number of data points ( $N$ ) included in each analysis varied because not all values were available for all species.

## Appendix Table A

### a) CONTINUOUS

| Traits compared                           | N  | $\ln L H_0$ | $\ln L H_1$ | Test statistic | P value | Correlation |
|-------------------------------------------|----|-------------|-------------|----------------|---------|-------------|
| AGT distribution & diet                   | 77 | -209.983    | -178.662    | 62.642         | <0.001  | 0.751       |
| AGT distribution & body mass              | 77 | -238.094    | -235.546    | 5.096          | 0.024   | 0.253       |
| AGT distribution & gestation length       | 70 | -136.404    | -135.378    | 2.052          | 0.152   | 0.170       |
| AGT distribution & AGT immunoreactivity   | 38 | -88.8125    | -88.175     | 0.128          | 0.259   | -0.182      |
| AGT distribution & AGT catalytic activity | 38 | -98.755     | -98.317     | 0.876          | 0.349   | -0.159      |
| Diet & body mass                          | 77 | -293.096    | -291.538    | 3.116          | 0.078   | 0.199       |

### b) CAIC

| Traits compared                           | N  | R <sup>2</sup> | Slope  | F ratio | P value |
|-------------------------------------------|----|----------------|--------|---------|---------|
| AGT distribution & diet                   | 77 | 0.561          | 1.535  | 90.618  | <0.001  |
| AGT distribution & body mass              | 77 | 0.069          | 0.765  | 5.291   | 0.024   |
| AGT distribution & gestation length       | 70 | 0.035          | 0.161  | 2.420   | 0.125   |
| AGT distribution & AGT immunoreactivity   | 38 | 0.032          | -0.228 | 1.200   | 0.281   |
| AGT distribution & AGT catalytic activity | 38 | 0.020          | -0.228 | 0.736   | 0.397   |
| Diet & body mass                          | 77 | 0.041          | 0.285  | 2.998   | 0.088   |

## **Appendix Figure A.**

### **Immuno-gold electron microscopic analysis of AGT distribution in bat livers.**

Immunoreactive AGT was determined in various bat livers using the immunogold technique (see Methods section). In order to aid visibility, panels A-H are traces of the immunoelectron micrographs in panels A\*-H\*, respectively. A, Seba's short-tailed fruit bat (*Carollia perspicillata*); B, Rodriguez fruit bat (*Pteropus rodricensis*); C, serotine bat (*Eptesicus serotinus*); D, noctule bat (*Nyctalus noctula*); E, pipistrelle bat (*Pipistrellus pipistrellus*); F, long-eared bat (*Plecotus auritus*); G, common vampire bat (*Desmodus rotundus*); H, horseshoe bat (*Rhinolophus ferrumequinum*). In the traces, peroxisomes are shaded white and bounded by dashed lines. Mitochondria are shaded light grey and bounded by solid lines. Bars = 500nm. Bats A and B are categorised as peroxisomal, C-F as mitochondrial + peroxisomal, and G and H as mitochondrial.

## **Appendix Figure B.**

### **Immuno-gold electron microscopic analysis of AGT distribution in miscellaneous mammalian livers.**

Immunoreactive AGT was determined in various mammalian livers using the immunogold technique (see Methods section). In order to aid visibility, panels A-F are traces of the immunoelectron micrographs in panels A\*-F\*, respectively. A, cuscus (*Strigocuscus gymnotis*); B, Przewalski's horse (*Equus przewalskii*); C, dunnarts (*Sminthopsis crassicaudata*); D, slow loris (*Nycticebus coucang*); E, short-nosed echidna (*Tachyglossus aculeatus*); F, oriental small-clawed otter (*Amblonyx cinereus*). In the traces, peroxisomes are shaded white and bounded by dashed lines. Mitochondria are shaded light grey and bounded by solid lines. Bars = 500nm. A and B are categorised as peroxisomal, C and D as mitochondrial + peroxisomal, and E and F as mitochondrial.

Appendix Figure A

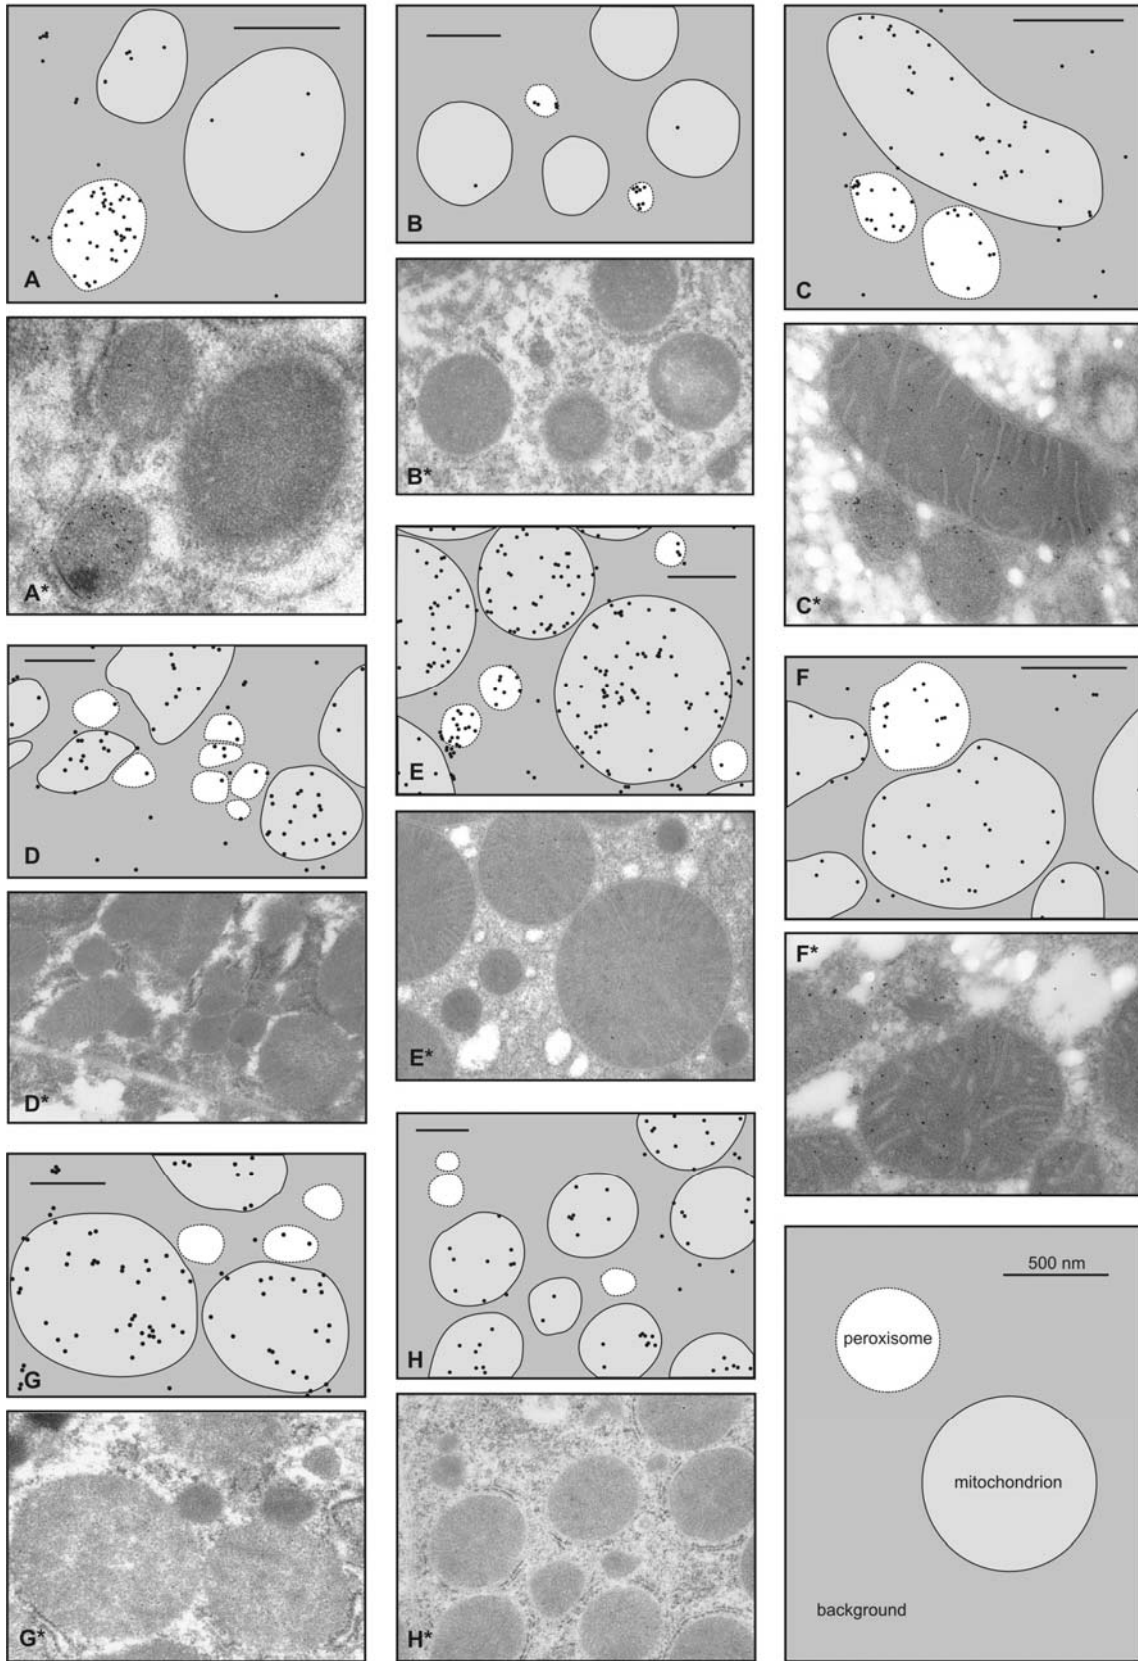

Appendix Figure B

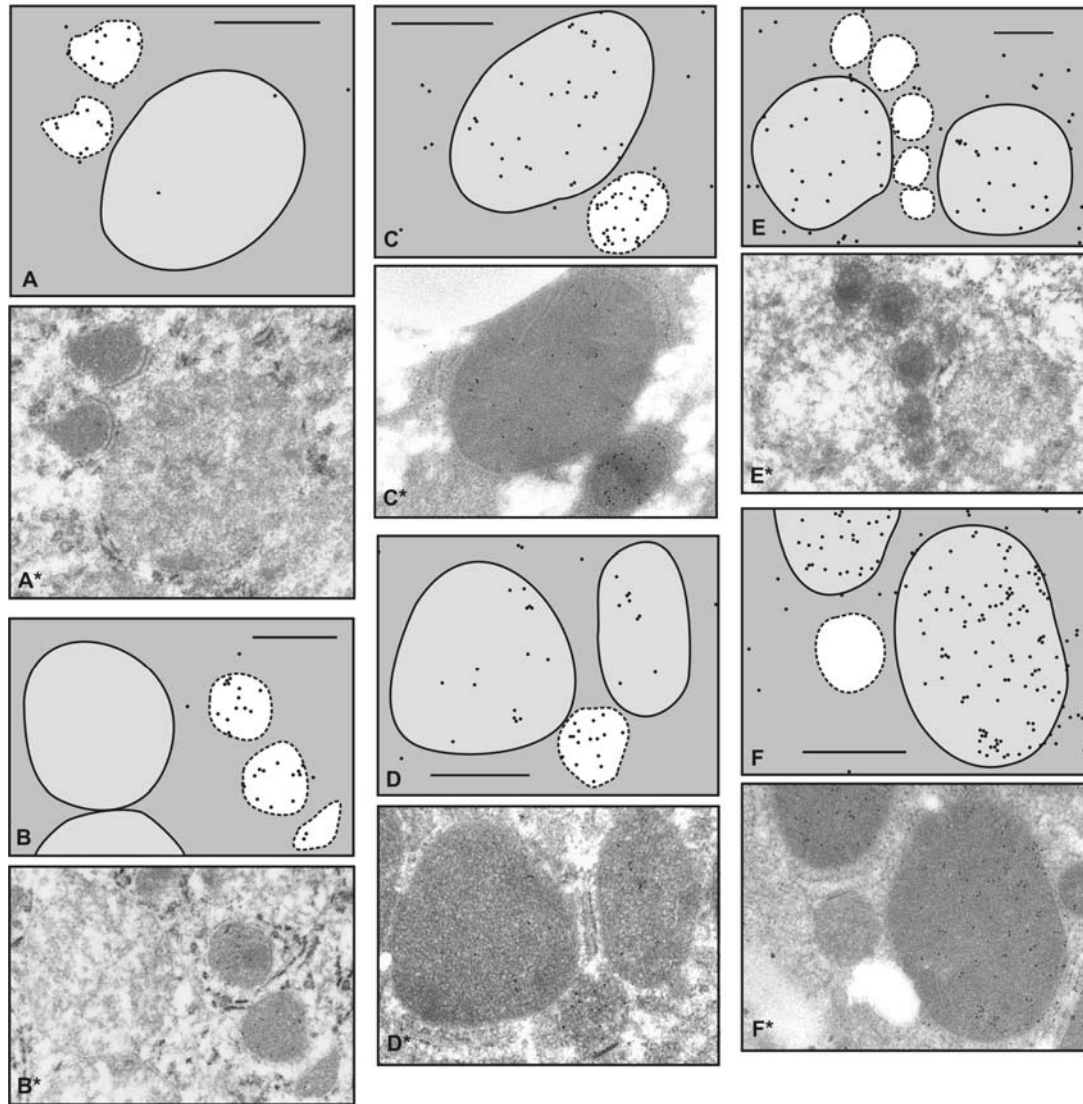

Supplement: rspb20043011s03.pdf [file rspb20043011s03.pdf]
